# Supplementary material for: Research on Torsional Property of Body-In-White Based on Square Box Model and Multiobjective Genetic Algorithm
Source: Hindawi journal article supplement (doi:10.1155/2021/7826496), 2021-01-23
Supplement: f1 [file 7826496.f1.docx]

**Supplementary Materials**


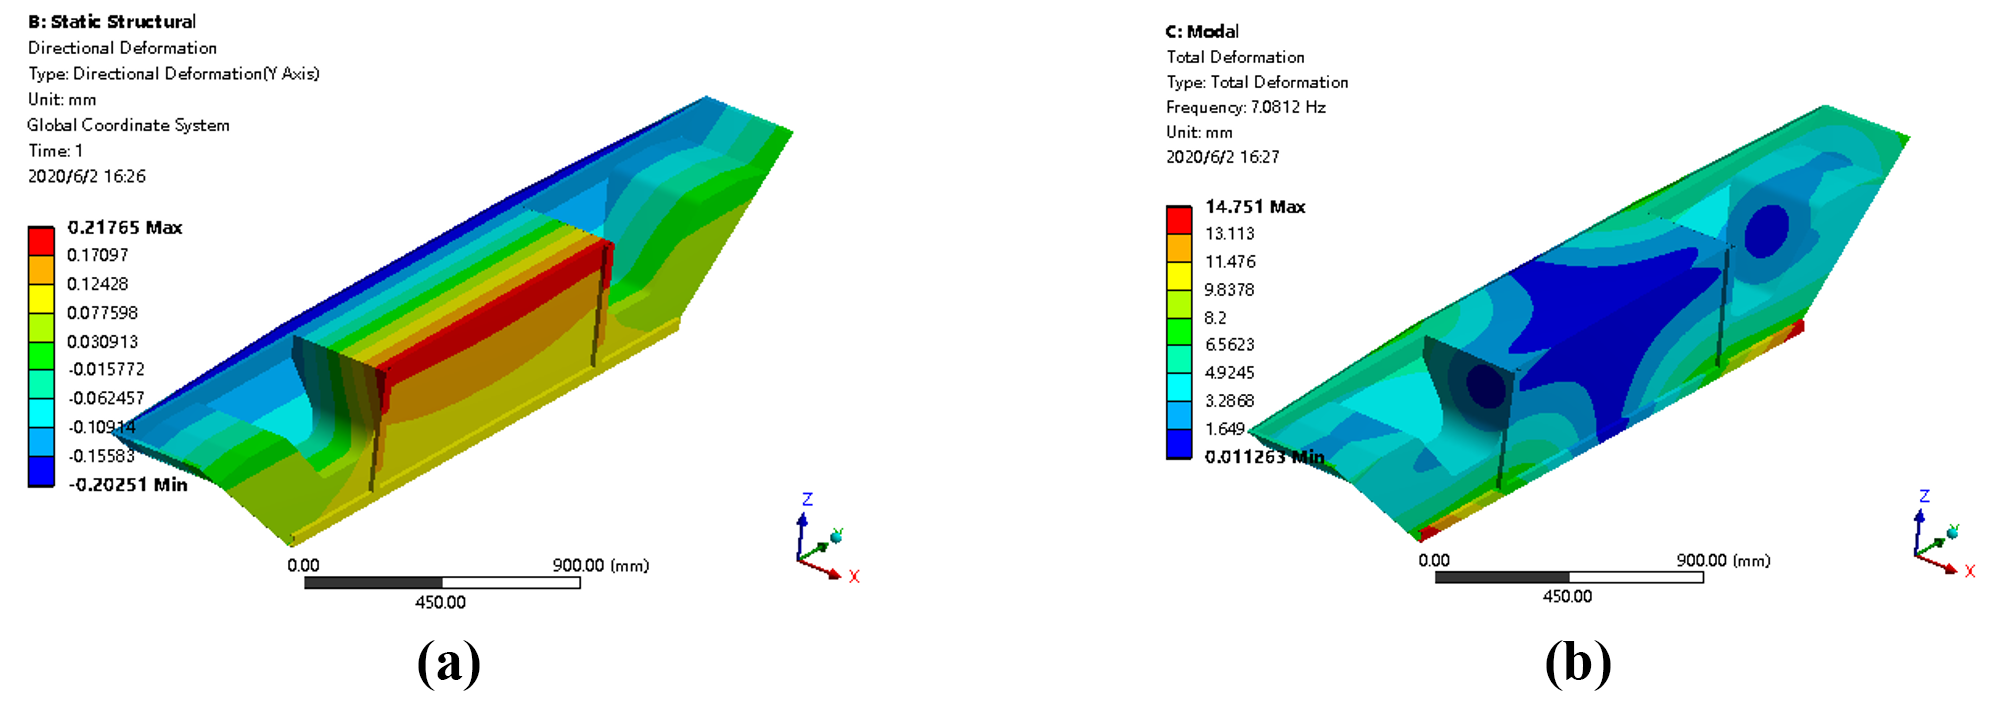


Figure S1: Results of SSS-7 after optimization. (a) The displacement of SSS-7. (b) The first-order frequency of SSS-7.


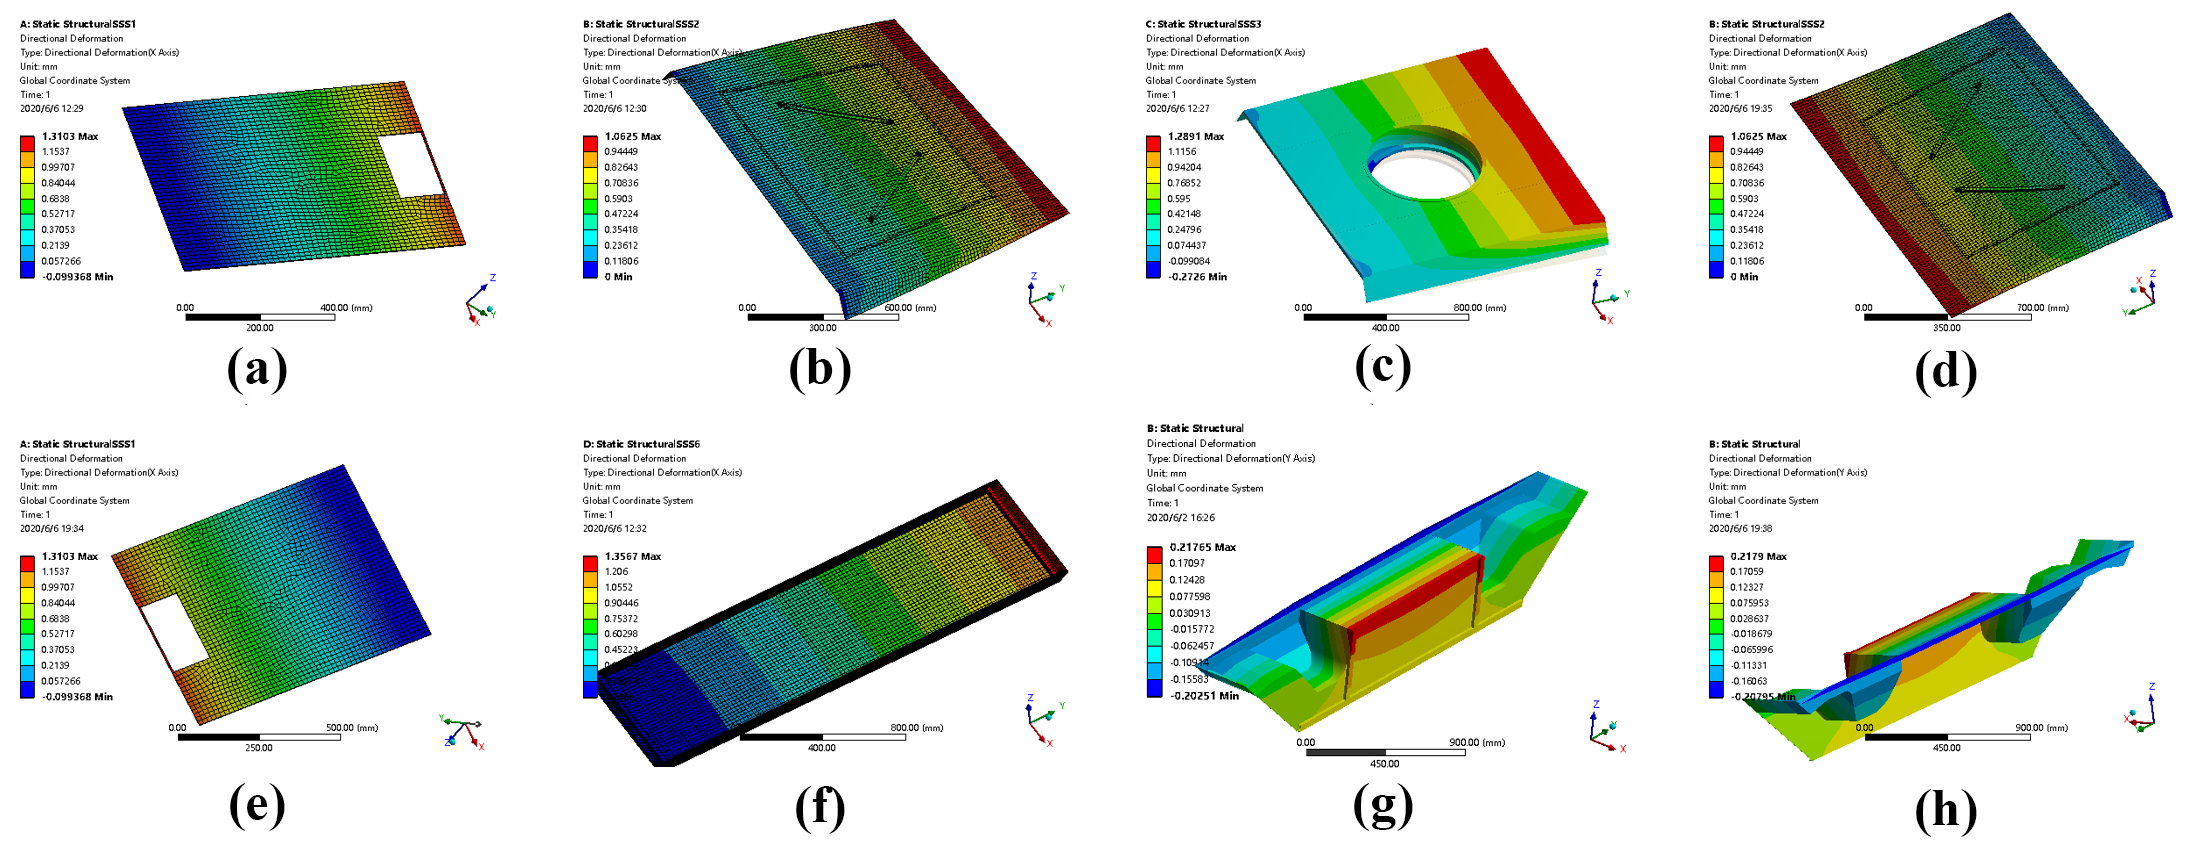


Figure S2: The displacement of deformation for SSS after the optimizations. (a) The displacement of SSS-1. (b) The displacement of SSS-2. (c) The displacement of SSS-3. (d) The displacement of SSS-4. (e) The displacement of SSS-5. (f) The displacement of SSS-6. (g) The displacement of SSS-7. (h) The displacement of SSS-8.
